# Supplementary material
Source: MDPI journal article supplement (https://www.mdpi.com/2076-3417/12/16/8237)
Supplement: s1 [file s1 › applsci-1837735-supplementary.pdf]

## Supplementary information for

### “Efficient gene transfection by electroporation - *in vitro* and *in silico* study of pulse parameters”

Tjaša Potočnik, Shaurya Sachdev, Tamara Polajžer, Alenka Maček Lebar, Damijan Miklavčič  
University of Ljubljana, Faculty of Electrical Engineering, Tržaška 25, 1000 Ljubljana, Slovenia

#### Various estimates of DNA cell membrane distance as a function of concentration

**Supplementary Table S1:** Various estimates of the distance between a pDNA molecule and the nearest cell membrane ( $R_{DNA}$ ) based on equation (3) in the main text. For interpretation of  $B_L$ ,  $B_R$  and  $R_{DNA}$ , refer to Figure 1 in the main text.

|                                            | $B_L, B_R, R_{DNA}$ (nm) |        |
|--------------------------------------------|--------------------------|--------|
| pDNA concentration<br>( $\mu\text{g/ml}$ ) | C2C12                    | 1306   |
| 40                                         | 312.79                   | 312.98 |
| 80                                         | 248.26                   | 248.42 |
| 100                                        | 230.46                   | 230.61 |
| 250                                        | 169.81                   | 169.91 |
| 500                                        | 134.78                   | 134.86 |

In the main text, the model determining the probability that a DNA molecule will come in contact with the cell membrane require a definition of the boundaries within which a DNA molecule is allowed to move. As a first estimate (based on **Figure 1** of main text), the left boundary ( $B_L$ ) and the right boundary ( $B_R$ ) were considered as  $R_{DNA}$ . However, based on **Supplementary Figure S1**, other estimates of  $B_L$  and  $B_R$  that can be considered such as:  $R_{DNA}$ ,  $R_{DNA} - R_g$  and  $2R_{DNA} - 2R_g$ ; where  $R_g$  is the radius of gyration of the DNA molecule.

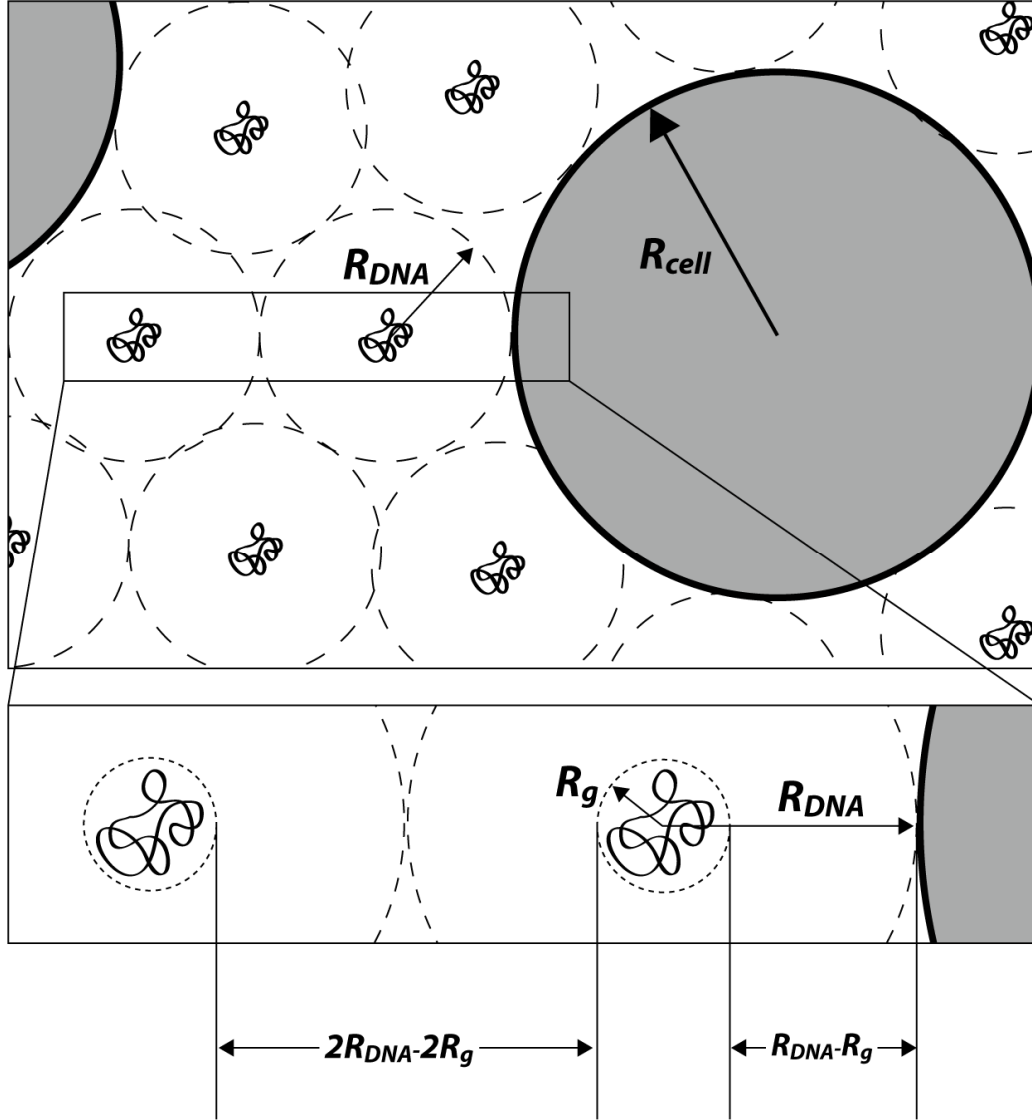

**Supplementary Figure S1:** Schematic of distribution of pDNA molecules and cells in suspension.  $R_{cell}$  represents the radius of the cell,  $R_{DNA}$  represents the radius of the (nominal/free) spherical space available to the pDNA molecule and  $R_g$  represents the radius of gyration of the pDNA molecule. Subset figure shows various estimates that can be considered as the distance between a DNA molecule and the nearest cell membrane and the distance between 2 DNA molecules.

$R_g$  for a stained (YOYO-1) circular 5.9 kbp pDNA molecule is around 131 nm [1]. Since pDNA molecules used in the current study are unstained, the unstained  $R_g$  can be obtained as  $\frac{R_{g,unstained}}{R_{g,stained}} = \left(\frac{L_{unstained}}{L_{stained}}\right)^{0.58}$  [1,2]. Since YOYO-1 staining increases the contour length of the pDNA molecule by 1.35 times [1], unstained  $R_g$  for 5.9 kbp is estimated to be around 110 nm. To calculate the  $R_g$  for 4.7 kbp pDNA molecule, the same scaling relation can be used:  $\frac{R_{g,4700\text{ bp}}}{R_{g,5900\text{ bp}}} = \left(\frac{L_{4700\text{ bp}}}{L_{5900\text{ bp}}}\right)^{0.58} = \left(\frac{4700}{5900}\right)^{0.58}$ . Therefore,  $R_g$  for 4700 bp is estimated to be around 96 nm. Various estimates of distance between a DNA molecule and the cell membrane and between DNA molecules are given in **Supplementary Table S2**.

**Supplementary Table S2:** Various estimates of the distance between a DNA molecule and the nearest cell membrane and between two pDNA molecules.

|                                    | $R_{DNA}$ (nm) |        | $2 * R_{DNA} - 2 * R_g$ (nm) |        | $R_{DNA} - R_g$ (nm) |        |
|------------------------------------|----------------|--------|------------------------------|--------|----------------------|--------|
| Concentration ( $\mu\text{g/ml}$ ) | C2C12          | 1306   | C2C12                        | 1306   | C2C12                | 1306   |
| 40                                 | 312.79         | 312.98 | 433.57                       | 433.97 | 216.79               | 216.98 |
| 80                                 | 248.26         | 248.42 | 304.52                       | 304.83 | 152.26               | 152.42 |
| 100                                | 230.46         | 230.61 | 268.92                       | 269.22 | 134.46               | 134.61 |
| 250                                | 169.81         | 169.91 | 147.61                       | 147.83 | 73.81                | 73.91  |
| 500                                | 134.78         | 134.86 | 77.55                        | 77.72  | 38.78                | 38.86  |

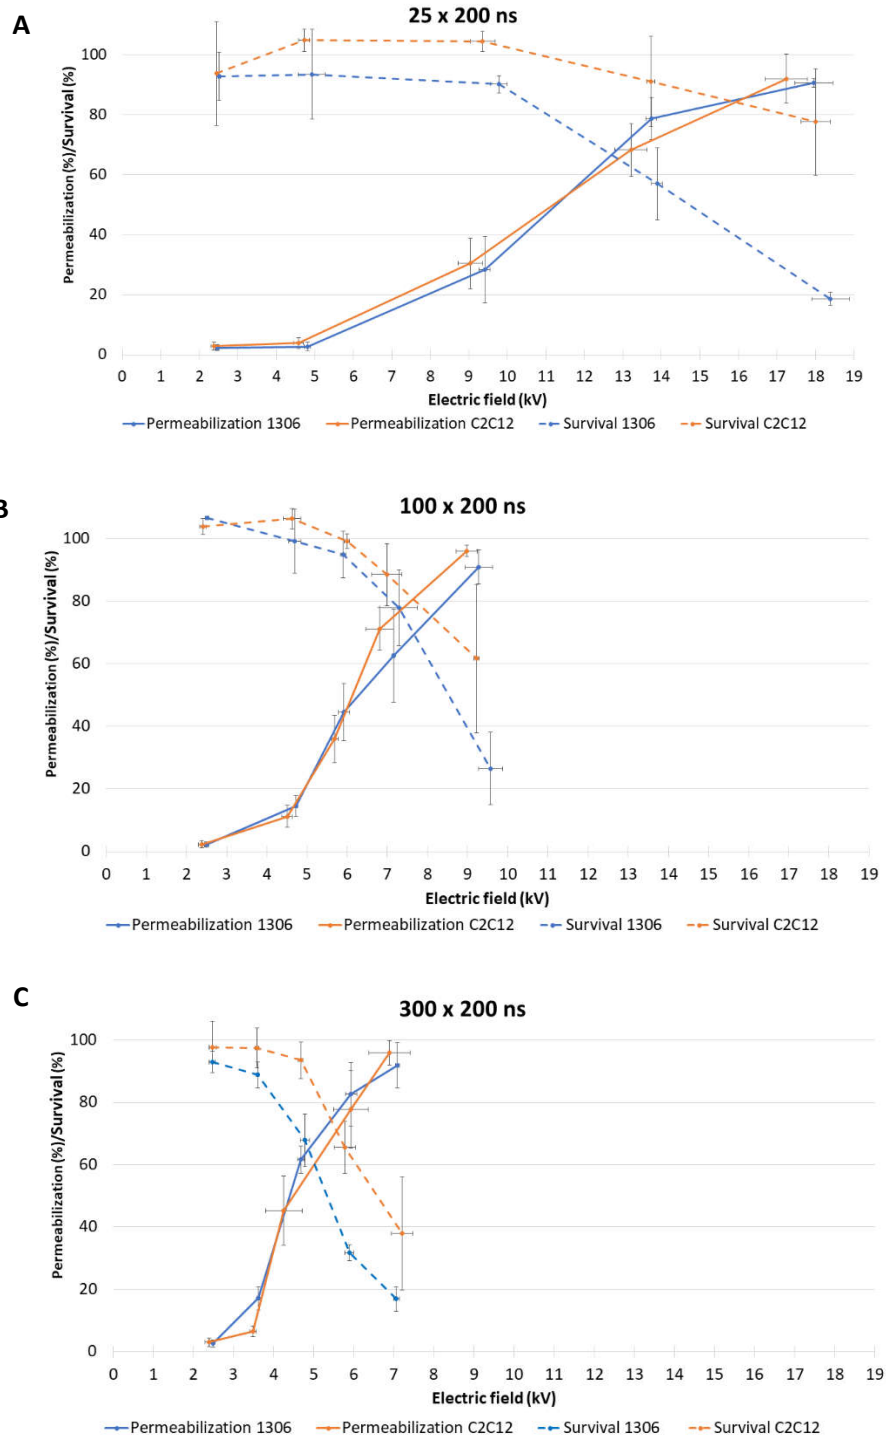

**Supplementary figure S2:** Comparison of permeabilization and survival curves of C2C12 myoblast and 1306 fibroblasts with 200 ns pulses and 10 Hz pulse repetition rate. **A)** 25 x 200 ns pulses, **B)** 100 x 200 ns pulses, **C)** 300 x 200 ns pulses. Results are presented as average of 3 repetitions. Bars represent standard deviation.

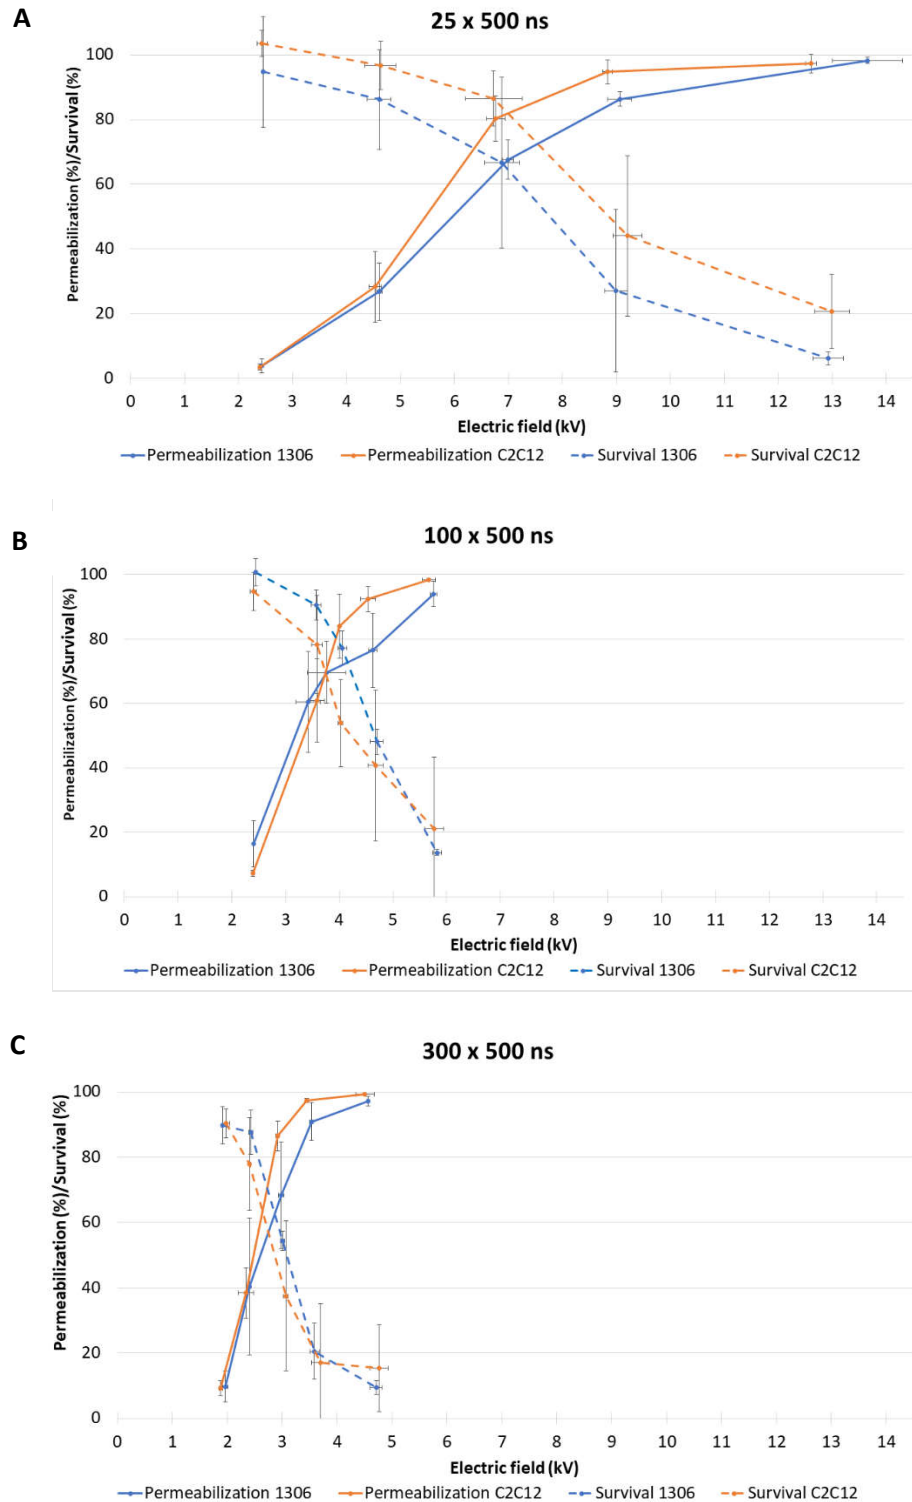

**Supplementary figure S3:** Comparison of permeabilization and survival curves of C2C12 myoblast and 1306 fibroblasts with 500 ns pulses and 10 Hz pulse repetition rate. **A)** 25 x 500 ns pulses, **B)** 100 x 500 ns pulses, **C)** 300 x 500 ns pulses. Results are presented as average of 3 repetitions. Bars represent standard deviation.

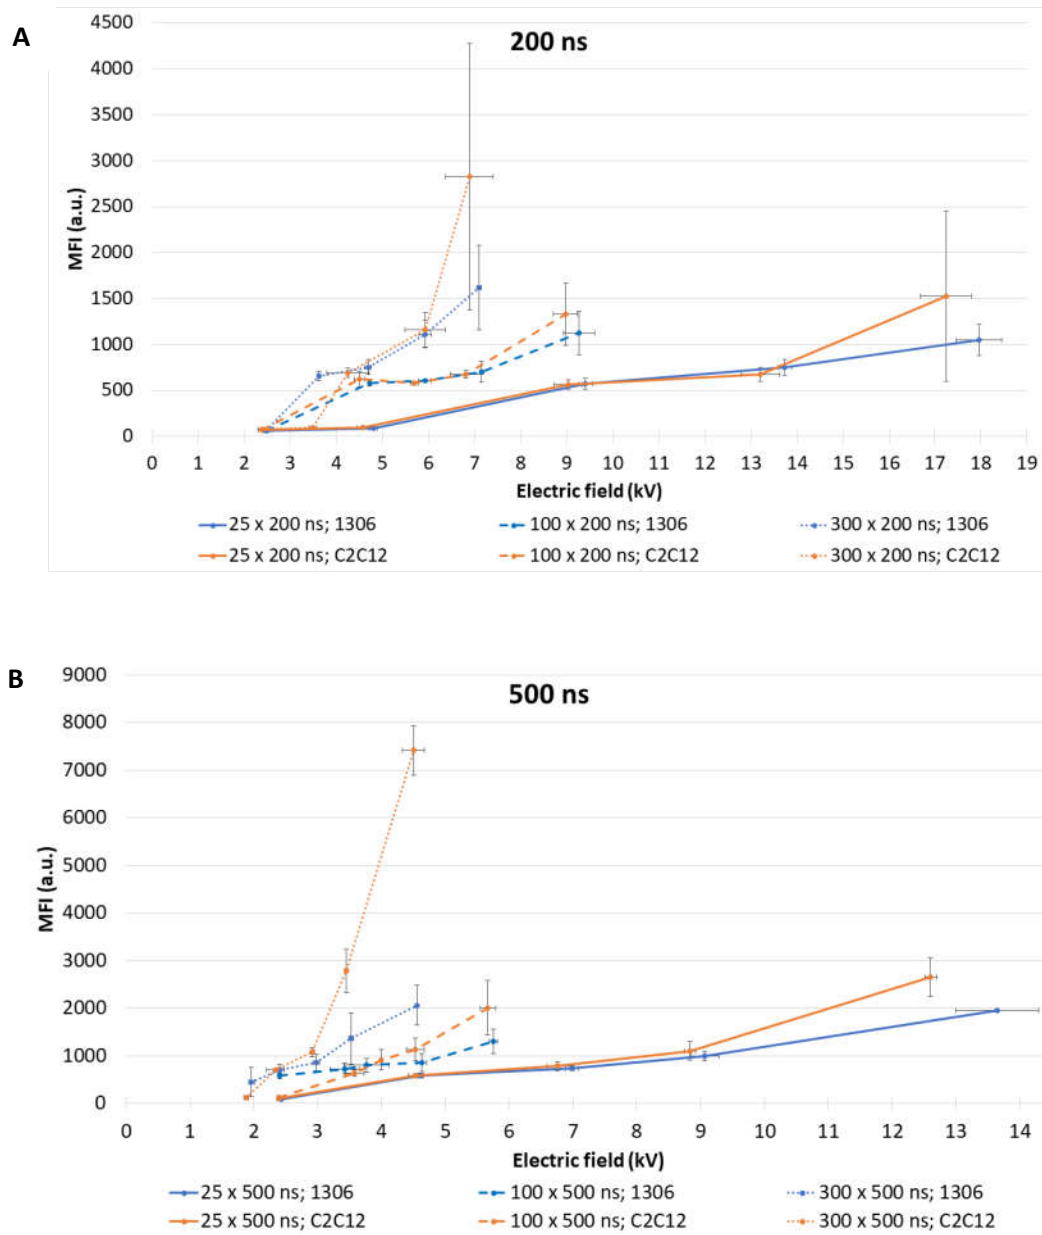

**Supplementary figure S4:** Comparison of median fluorescence intensity (MFI) of permeabilized C2C12 myoblast and 1306 fibroblasts with **A)** 200 ns pulses and 10 Hz pulse repetition rate and **B)** 500 ns pulses. Results are presented as average of 3 repetitions. Bars represent standard deviation. Please note that the scale for MFI is different between **A** in **B**.

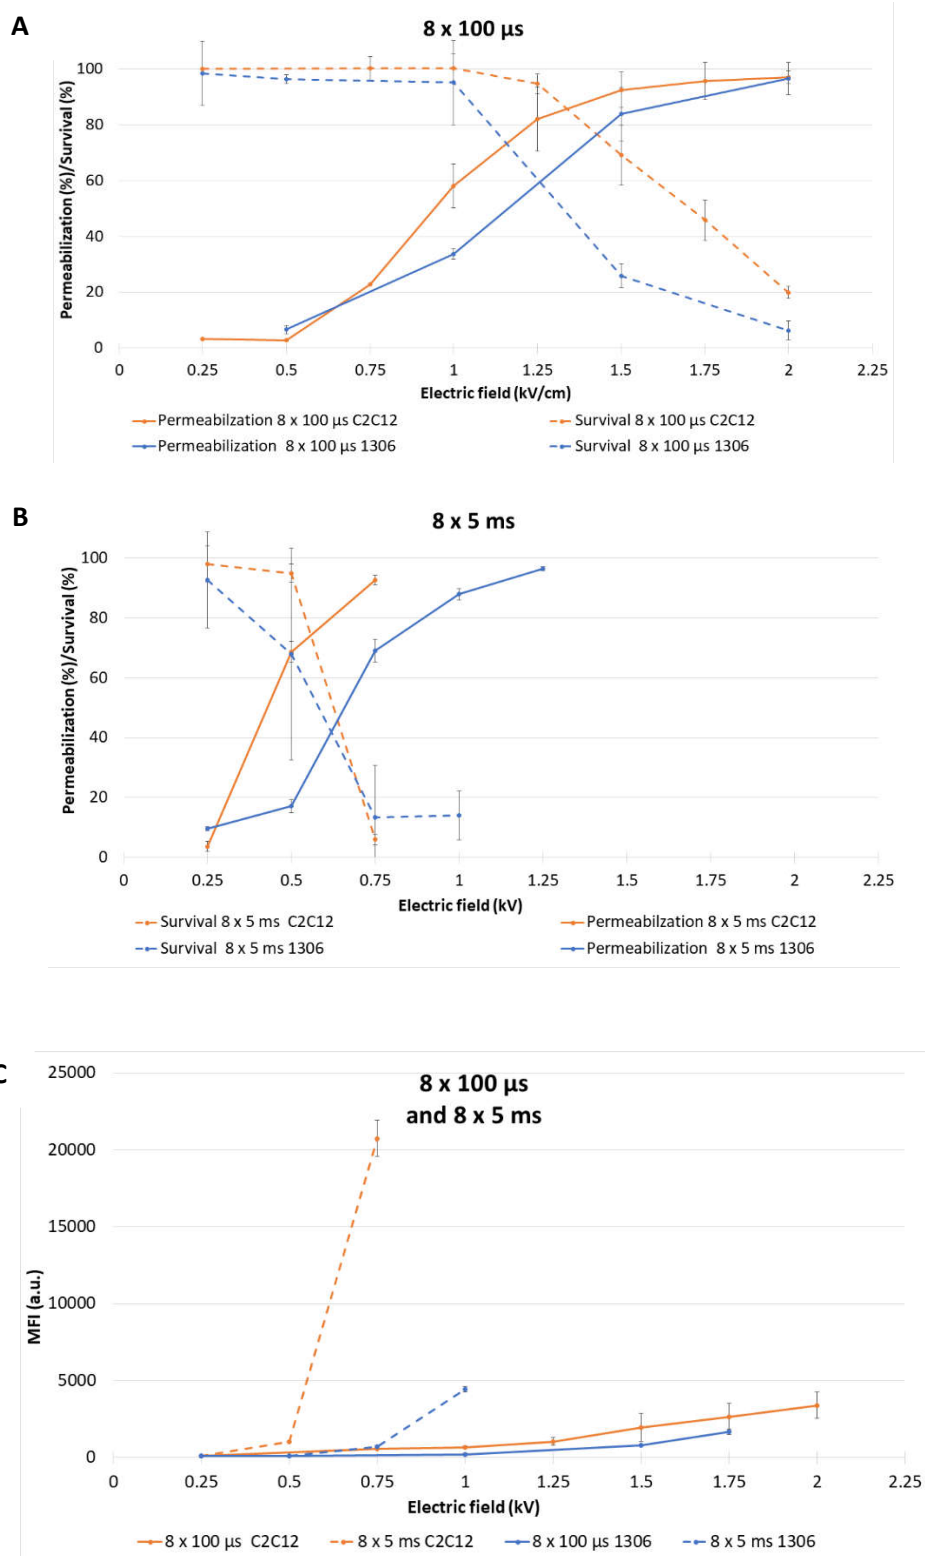

**Supplementary figure S5:** Comparison of permeabilization and survival curves of C2C12 myoblast and 1306 fibroblasts with **A)** 8 x 100  $\mu$ s, 1 Hz pulses and **B)** 8 x 5 ms, 1 Hz pulses. **C)** Median fluorescence

intensity (MFI) of permeabilized cells. Results are presented as average of 3 repetitions. Bars represent standard deviation.

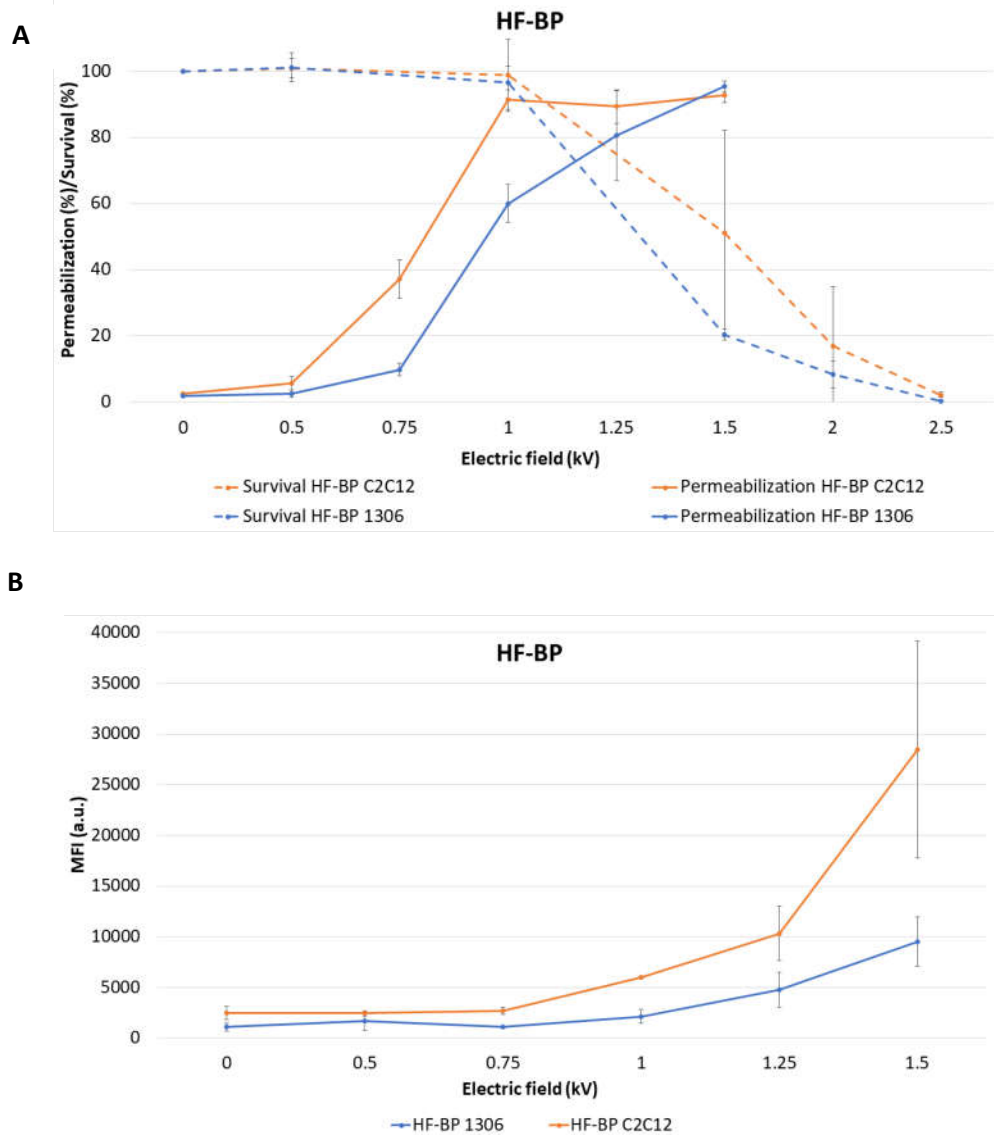

**Supplementary figure S6:** Comparison of permeabilization and survival curves of C2C12 myoblast and 1306 fibroblasts with **A)** HF-BP pulse protocol and **B)** Median fluorescence intensity (MFI) of permeabilized cells. Results are presented as average of 3 repetitions. Bars represent standard deviation.

**Supplementary table S3:** Nanosecond, HF-BP, micro and millisecond pulse protocols with which the best overall GET with 500 µg/ml of pEGFP-N1 was achieved in C2C12 myoblasts.

| <b>C2C12 myoblasts, 500 µg/ml of pEGFP-N1</b>    |                     |                          |                             |
|--------------------------------------------------|---------------------|--------------------------|-----------------------------|
| <b>Pulse protocol</b>                            | <b>GET ± SD (%)</b> | <b>Survival ± SD (%)</b> | <b>Overall GET ± SD (%)</b> |
| 25 x 200 ns, 10 Hz, 15.8 kV/cm                   | 17.71 ± 0.52        | 66.85 ± 16.09            | 11.89 ± 4.42                |
| 100 x 200 ns, 10 Hz, 6.9 kV/cm                   | 12.28 ± 4.64        | 75.56 ± 4.82             | 9.5 ± 4.82                  |
| 300 x 200 ns, 10 Hz, 6.3 kV/cm                   | 10.35 ± 4.43        | 33.35 ± 18.01            | 2.66 ± 0.93                 |
| 25 x 500 ns, 10 Hz, 6.9 kV/cm                    | 18.20 ± 1.05        | 57.95 ± 11.83            | 10.43 ± 1.99                |
| 100 x 500 ns, 10 Hz, 4.1 kV/cm                   | 16.98 ± 5.32        | 63.76 ± 20.06            | 11.73 ± 7.10                |
| 300 x 500 ns, 10 Hz, 2.4 kV/cm                   | 6.36 ± 3.50         | 64.92 ± 12.60            | 4.33 ± 3.01                 |
| 2-2-2-2, 32 pulses, 100 bursts, 1 Hz, 1.25 kV/cm | 30.06 ± 1.33        | 61.45 ± 6.48             | 18.42 ± 1.17                |
| 8 x 100 µs, 1Hz, 1.25 kV/cm                      | 46.02 ± 20.03       | 71.25 ± 19.31            | 30.44 ± 5.26                |
| 8 x 5 ms, 1Hz, 0.4 kV/cm                         | 39.83 ± 7.16        | 89.35 ± 13.40            | 35.39 ± 6.94                |

**Supplementary table S4:** Nanosecond, HF-BP, micro and millisecond pulse protocols with which the best overall GET with 500 µg/ml of pEGFP-N1 was achieved in 1306 fibroblasts.

| <b>1306 fibroblasts, 500 µg/ml of pEGFP-N1</b> |                     |                          |                             |
|------------------------------------------------|---------------------|--------------------------|-----------------------------|
| <b>Pulse protocol</b>                          | <b>GET ± SD (%)</b> | <b>Survival ± SD (%)</b> | <b>Overall GET ± SD (%)</b> |
| 25 x 200 ns, 10 Hz, 12.8 kV/cm                 | 35.89 ± 12.33       | 77.15 ± 7.66             | 27.45 ± 8.29                |
| 100 x 200 ns, 10 Hz, 6.9 kV/cm                 | 29.24 ± 13.70       | 91.18 ± 12.78            | 26.49 ± 11.52               |
| 300 x 200 ns, 10 Hz, 4.2 kV/cm                 | 25.35 ± 9.87        | 83.29 ± 6.17             | 21.28 ± 10.26               |
| 25 x 500 ns, 10 Hz, 6.5 kV/cm                  | 42.30 ± 9.18        | 58.82 ± 15.27            | 24.89 ± 7.65                |
| 100 x 500 ns, 10 Hz, 3.5 kV/cm                 | 30.87 ± 23.40       | 63.17 ± 17.10            | 19.16 ± 13.88               |
| 300 x 500 ns, 10 Hz, 2.7 kV/cm                 | 24.25 ± 5.66        | 54.20 ± 16.56            | 13.30 ± 5.83                |
| 2-2-2-2, 32 pulses, 100 bursts, 1 Hz, 1 kV/cm  | 29.02 ± 4.80        | 73.87 ± 2.54             | 21.47 ± 2.49                |
| 8 x 100 µs, 1Hz, 1.25 kV/cm                    | 46.38 ± 4.43        | 68.39 ± 2.63             | 31.70 ± 2.98                |
| 8 x 5 ms, 1Hz, 0.6 kV/cm                       | 25.55 ± 6.16        | 53.51 ± 17.30            | 14.37 ± 7.18                |

### Temperature measurement during pulse delivery

For each pulse protocol tested, the temperature increase above the baseline of the cell sample during pulse delivery is given in **Supplementary table S5**. All experiments were performed at room temperature between 24.6 °C and 26.7 °C. The highest increase of 5.4 °C was measured when the 8 x 5 ms pulse protocol was applied to the 1306 fibroblasts sample.

**Supplementary table S5.** Maximum temperature increases of the cell sample during pulse delivery. For each pulse protocol, the results of two measurements are given.

|                  | 200 ns /°C | 500 ns /°C | HF-BP/°C | 8 x 100 $\mu$ s /°C | 8 x 5 ms /°C |
|------------------|------------|------------|----------|---------------------|--------------|
| C2C12 myoblasts  | 1.4        | 0.6        | 5.2      | 1.0                 | 4.9          |
|                  | 2.0        | 0.8        | 5.2      | 1.0                 | 3.4          |
| 1306 fibroblasts | 1.3        | 0.8        | 2.7      | 0.9                 | 5.4          |
|                  | 1.4        | 0.7        | 3.2      | 0.8                 | 5.1          |

### References

1. Robertson, R.M.; Smith, D.E. Self-Diffusion of Entangled Linear and Circular DNA Molecules: Dependence on Length and Concentration. *Macromolecules* **2007**, *40*, 3373–3377, doi:10.1021/ma070051h.
2. Robertson, R.M.; Laib, S.; Smith, D.E. Diffusion of Isolated DNA Molecules: Dependence on Length and Topology. *Proc. Natl. Acad. Sci. U. S. A.* **2006**, *103*, 7310–7314, doi:10.1073/pnas.0601903103.
